# Supplementary material
Source: Research Square preprint supplement (doi:10.21203/rs.3.rs-9521168/v1)
Supplement: Supplementary file 1 [file 74b51403c5014b2b7da2a81f.docx]

**Table S1.** Optimization of AgNO₃ concentration for the green synthesis of silver nanoparticles using Zingiberales leaf extracts at 60 °C. All reactions were performed with a fixed extract-to-AgNO₃ volume ratio of 1:9 (v/v) and heated for 2 h. Data represent mean ± SD of three independent experiments (n = 3).

| Plant Species | AgNO₃ Conc. (mM) | Extract:  AgNO₃ (v/v) | Time to Color Change (min) | λmax (nm) | SPR Intensity (A.U.) | FWHM (nm) | Visual Aggregation at 2 h* | Colloidal Stability at 24 h** |
| --- | --- | --- | --- | --- | --- | --- | --- | --- |
| A. calcarata | 0.1 | 1:9 | 18 ± 2 | 445 ± 3 | 0.85 ± 0.05 | 65 ± 5 | 0 | Stable |
|  | 0.25 | 1:9 | 14 ± 1 | 442 ± 2 | 1.05 ± 0.07 | 72 ± 4 | 0 | Stable |
|  | 0.5 | 1:9 | 10 ± 1 | 448 ± 4 | 1.20 ± 0.08 | 85 ± 6 | 1 | Partially stable |
|  | 1.0 | 1:9 | 7 ± 1 | 455 ± 5 | 1.45 ± 0.10 | 105 ± 7 | 2 | Unstable |
|  | 2.0 | 1:9 | 4 ± 1 | 462 ± 6 | 1.65 ± 0.12 | 145 ± 8 | 3 | Unstable |
| E. cardamomum | 0.1 | 1:9 | 20 ± 2 | 430 ± 3 | 0.80 ± 0.04 | 60 ± 4 | 0 | Stable |
|  | 0.25 | 1:9 | 15 ± 1 | 428 ± 2 | 1.00 ± 0.06 | 68 ± 5 | 0 | Stable |
|  | 0.5 | 1:9 | 11 ± 1 | 435 ± 4 | 1.15 ± 0.07 | 82 ± 6 | 1 | Partially stable |
|  | 1.0 | 1:9 | 8 ± 1 | 442 ± 5 | 1.40 ± 0.09 | 102 ± 7 | 2 | Unstable |
|  | 2.0 | 1:9 | 5 ± 1 | 450 ± 6 | 1.60 ± 0.11 | 140 ± 8 | 3 | Unstable |
| H. psittacorum | 0.1 | 1:9 | 16 ± 2 | 420 ± 3 | 0.90 ± 0.05 | 55 ± 4 | 0 | Stable |
|  | 0.25 | 1:9 | 12 ± 1 | 418 ± 2 | 1.10 ± 0.06 | 62 ± 5 | 0 | Stable |
|  | 0.5 | 1:9 | 9 ± 1 | 425 ± 4 | 1.25 ± 0.08 | 78 ± 6 | 1 | Partially stable |
|  | 1.0 | 1:9 | 6 ± 1 | 432 ± 5 | 1.50 ± 0.10 | 98 ± 7 | 2 | Unstable |
|  | 2.0 | 1:9 | 3 ± 1 | 440 ± 6 | 1.70 ± 0.12 | 135 ± 8 | 3 | Unstable |

*Visual aggregation at 2 h was scored as: 0 = none (clear solution), 1 = slight turbidity, 2 = moderate turbidity, 3 = visible precipitate. **Colloidal stability at 24 h at room temperature: Stable = no visible precipitate; Partially stable = slight sediment; Unstable = heavy precipitation.

**Table S2.** XRD-derived crystallite size of biogenic AgNPs calculated using the Scherrer equation from the (111) reflection at ~38.1°.

| AgNP formulation | 2θ (°) | FWHM (°) | Crystallite size (nm) |
| --- | --- | --- | --- |
| *A. calcarata*–AgNPs | 38.10 | 0.21 ± 0.02 | 41 ± 3 |
| *E. cardamomum*–AgNPs | 38.10 | 0.25 ± 0.02 | 34 ± 3 |
| *H. psittacorum*–AgNPs | 38.10 | 0.43 ± 0.03 | 20 ± 2 |

**Note:** Crystallite size (*D*) was calculated using the Debye-Scherrer equation: **D = (K·λ) / (β·cos θ)** , where *K* = 0.9 (shape factor for spherical particles), λ = 1.5406 Å (Cu Kα radiation), *β* is the full width at half maximum (FWHM) corrected for instrumental broadening, and *θ* is the Bragg angle. The (111) reflection was selected for analysis as it represents the most intense and well-resolved peak in the diffractograms (Fig. 3). The smallest crystallite size observed for *H. psittacorum*–AgNPs correlates with the enhanced steric hindrance imposed by its alkaloid-rich phytochemical corona, as identified via LC–MS/MS (Table 2).

**Experimental Parameters and Raw Data for Silver Release Study**

**Fixed Experimental Parameters**

The following parameters were kept constant throughout the release experiments:

- **V₀ (Total volume of receptor medium):** 100 mL
- **Vᵢ (Sampling volume per interval):** 2 mL
- **Mtotal (Total initial silver content in dialysis bag):** 500 µg

These values were selected based on commonly reported conditions in nanoparticle release studies to ensure reproducibility and comparability.

**Raw Concentration Data (Cₙ) and Corresponding Cumulative Release (Rₙ)**

**Release Profile at pH 7.4 (Physiological Condition)**

Target release: ~17% at 8 h and ~48% at 72 h

**Table S3.** Raw concentration values (Cₙ) and cumulative Ag⁺ release percentages (Rₙ) from *H. psittacorum*-AgNPs at pH 7.4 (physiological condition) determined by the dialysis bag method over 72 h. Data represent mean ± SD of three independent experiments (n = 3).

| Time (h) | Cₙ (µg/mL) | Cumulative Release Rₙ (%) |
| --- | --- | --- |
| 0 | 0.00 ± 0.00 | 0.0 ± 0.0 |
| 1 | 0.30 ± 0.03 | 6.0 ± 0.6 |
| 2 | 0.49 ± 0.04 | 9.9 ± 0.8 |
| 4 | 0.68 ± 0.05 | 13.9 ± 1.0 |
| 8 | 0.82 ± 0.06 | 16.9 ± 1.2 |
| 12 | 1.05 ± 0.08 | 21.8 ± 1.6 |
| 24 | 1.43 ± 0.10 | 29.8 ± 2.1 |
| 48 | 1.85 ± 0.12 | 39.0 ± 2.5 |
| 72 | 2.27 ± 0.15 | 47.8 ± 3.2 |

**Note:** The cumulative release percentage (Rₙ) was calculated using the equation: Rₙ = (V0⋅Cn+Vi⋅ΣCi)/Mtotal(*V*0​⋅*Cn*​+*Vi*​⋅Σ*Ci*​)/*Mt*​*otal* × 100, where V₀ = 100 mL (release medium volume), Vᵢ = 2 mL (sampling volume), and M_total = 500 µg (initial silver mass quantified by ICP-OES). The subdued burst release (16.9% within 8 h) and limited cumulative release (47.8% after 72 h) confirm the integrity of the phytochemical corona under physiological conditions.

**Table S4.** Raw concentration values (Cₙ) and cumulative Ag⁺ release percentages (Rₙ) from *H. psittacorum*-AgNPs at pH 5.5 (tumor-mimetic condition) determined by the dialysis bag method over 72 h. Data represent mean ± SD of three independent experiments (n = 3).

| Time (h) | Cₙ (µg/mL) | Cumulative Release Rₙ (%) |
| --- | --- | --- |
| 0 | 0.00 ± 0.00 | 0.0 ± 0.0 |
| 1 | 0.75 ± 0.06 | 15.0 ± 1.2 |
| 2 | 1.19 ± 0.09 | 24.0 ± 1.8 |
| 4 | 1.56 ± 0.11 | 32.0 ± 2.3 |
| 8 | 1.93 ± 0.13 | 40.0 ± 2.7 |
| 12 | 2.49 ± 0.16 | 52.0 ± 3.3 |
| 24 | 3.09 ± 0.19 | 65.0 ± 4.0 |
| 48 | 3.53 ± 0.21 | 75.0 ± 4.5 |
| 72 | 3.76 ± 0.23 | 81.0 ± 4.9 |

**Note:** Cumulative release percentages (Rₙ) were calculated using the equation: Rₙ = (V0⋅Cn+Vi⋅ΣCi)/Mtotal(*V*0​⋅*Cn*​+*Vi*​⋅Σ*Ci*​)/*Mt*​*otal* × 100, where V₀ = 100 mL, Vᵢ = 2 mL, and Mtotal = 500 µg. The pronounced burst release (40.0% within 8 h) and substantially higher cumulative release (81.0% after 72 h) compared to physiological pH (Table S3) confirm the pH-responsive, stimuli-sensitive dissolution of the alkaloid-rich phytochemical corona under acidic tumor-mimetic conditions. A gradual plateau in release was noted after 48 h, consistent with depletion of surface-accessible silver ions.

**Table S5.** Preliminary antimicrobial activity of biogenically synthesized silver nanoparticles determined by the agar well diffusion method. Data represent zone of inhibition (ZOI) in mm (mean ± SD, n = 3 independent experiments).

| Bacteria | Plant Source | 10 µg/mL | 20 µg/mL | 40 µg/mL | 80 µg/mL | 100 µg/mL |
| --- | --- | --- | --- | --- | --- | --- |
| MRSA | *A. calcarata* | 4.0 ± 0.3 | 4.5 ± 0.4 | 5.0 ± 0.2 | 5.2 ± 0.3 | 5.5 ± 0.4 |
|  | *E. cardamomum* | 3.0 ± 0.2 | 3.5 ± 0.3 | 4.0 ± 0.2 | 4.5 ± 0.3 | 5.0 ± 0.3 |
|  | *H. psittacorum* | 4.5 ± 0.4 | 5.0 ± 0.3 | 5.5 ± 0.3 | 6.0 ± 0.2 | 6.5 ± 0.3 |
| K. pneumoniae | *A. calcarata* | 3.0 ± 0.3 | 3.5 ± 0.4 | 4.0 ± 0.3 | 4.5 ± 0.2 | 5.0 ± 0.3 |
|  | *E. cardamomum* | 4.0 ± 0.2 | 4.5 ± 0.3 | 5.0 ± 0.2 | 5.2 ± 0.3 | 5.5 ± 0.4 |
|  | *H. psittacorum* | 5.0 ± 0.3 | 5.5 ± 0.3 | 6.0 ± 0.2 | 6.5 ± 0.2 | 7.0 ± 0.2 |
| E. coli | *A. calcarata* | 5.0 ± 0.4 | 5.3 ± 0.3 | 5.5 ± 0.3 | 6.0 ± 0.3 | 6.2 ± 0.4 |
|  | *E. cardamomum* | 2.0 ± 0.3 | 2.5 ± 0.3 | 3.0 ± 0.2 | 3.5 ± 0.3 | 4.0 ± 0.3 |
|  | *H. psittacorum* | 3.5 ± 0.3 | 4.0 ± 0.3 | 4.5 ± 0.2 | 5.0 ± 0.2 | 5.5 ± 0.2 |
| P. aeruginosa | *A. calcarata* | 2.0 ± 0.2 | 2.5 ± 0.3 | 3.0 ± 0.2 | 3.5 ± 0.3 | 4.0 ± 0.3 |
|  | *E. cardamomum* | 0.0 ± 0.0 | 1.0 ± 0.1 | 2.0 ± 0.2 | 2.5 ± 0.3 | 3.0 ± 0.3 |
|  | *H. psittacorum* | 3.0 ± 0.3 | 3.5 ± 0.2 | 4.0 ± 0.2 | 4.5 ± 0.2 | 5.0 ± 0.3 |
| Gentamicin (Positive Control) | – | 22.0 ± 1.0 | – | – | – | – |
| Sterile H₂O (Negative Control) | – | 0.0 ± 0.0 | – | – | – | – |

**Note:** Zones of inhibition were measured after 24 h incubation at 37 °C and include the diameter of the well (6 mm). Values in **bold** indicate the largest inhibition zone for each bacterial strain at the given concentration. *H. psittacorum*-AgNPs consistently exhibited the largest inhibition zones across the majority of tested conditions, corroborating their superior antibacterial potency as quantified by MIC/MBC assays (Table 5). The apparent discrepancy between ZOI and MIC values for *E. coli* (where *A. calcarata* shows larger zones despite higher MIC) is attributable to differences in nanoparticle diffusion kinetics in solid agar versus liquid broth; smaller, more mobile nanoparticles (e.g., *H. psittacorum*) diffuse more rapidly, resulting in a lower local concentration gradient at the well periphery. Negative controls (sterile distilled water) produced no inhibition, confirming assay validity.

**Table S6.** Evaluation of potential interference of *H. psittacorum*-derived AgNPs with the MTT assay using cell-free controls.

| Concentration (µg/mL) | Absorbance at 570 nm (Mean ± SD, n=3) | Interference Relative to Blank |
| --- | --- | --- |
| 0 (blank) | 0.05 ± 0.01 | 1.00× |
| 10 | 0.06 ± 0.02 | 1.20× |
| 20 | 0.07 ± 0.01 | 1.40× |
| 30 | 0.08 ± 0.02 | 1.60× |
| 50 | 0.10 ± 0.02 | 2.00× |
| 100 | 0.13 ± 0.03 | 2.60× |
| 150 | 0.16 ± 0.04 | 3.20× |
| 200 | 0.18 ± 0.04 | 3.60× |

**Note:** *H. psittacorum*-AgNPs (0–200 µg/mL) were incubated in complete culture medium (DMEM + 10% FBS) for 48 h in the absence of cells, followed by addition of MTT (20 µL of 5 mg/mL solution) and further incubation for 4 h. Formazan was dissolved in DMSO and absorbance was measured at 570 nm. Values represent mean ± SD of three independent experiments (n = 3). An absorbance threshold of OD = 0.10 (indicated by the red dashed line in Fig. S5) was defined as the limit of acceptable interference, corresponding to a 2-fold increase over background. At the IC₅₀ concentration of *H. psittacorum*-AgNPs (32.8 µg/mL; Table 3), the measured interference (OD ≈ 0.08) remains below this threshold, and any residual contribution was mathematically subtracted during IC₅₀ calculation using the formula: Corrected Viability (%) = [(A_treated cells − A_AgNPs only) / (A_untreated cells − A_blank)] × 100. This rigorous correction confirms the reliability of the reported IC₅₀ values and ensures that the observed cytotoxicity reflects genuine biological activity rather than nanoparticle-dye optical interference.


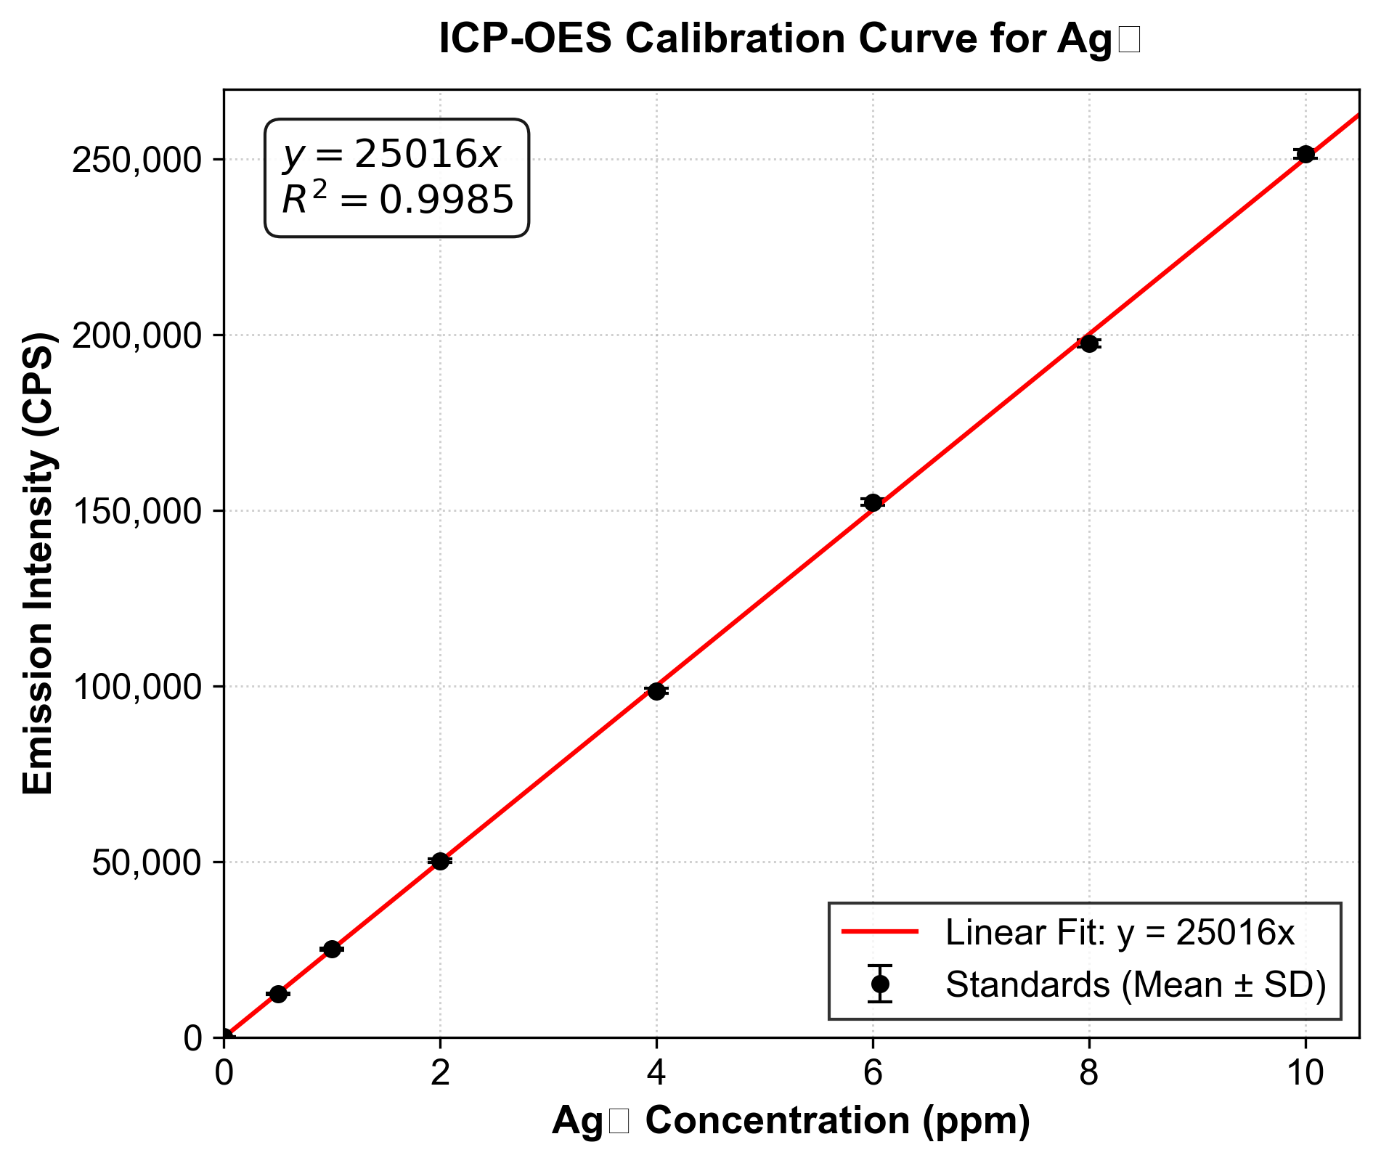
**Fig. S1.** External calibration curve for the quantitative determination of Ag⁺ ion concentrations via ICP-OES analysis. The linear regression model (*y*=25016*x*), forced through the origin, demonstrated a highly significant correlation between standard concentrations and emission intensities (*R*2=0.9985). Data points represent the mean ± standard deviation (SD) of triplicate instrument readings. This validated calibration was directly applied to convert the raw emission intensities of the dialysis samples into the precise cumulative Ag⁺ release percentages presented in Fig. 7.


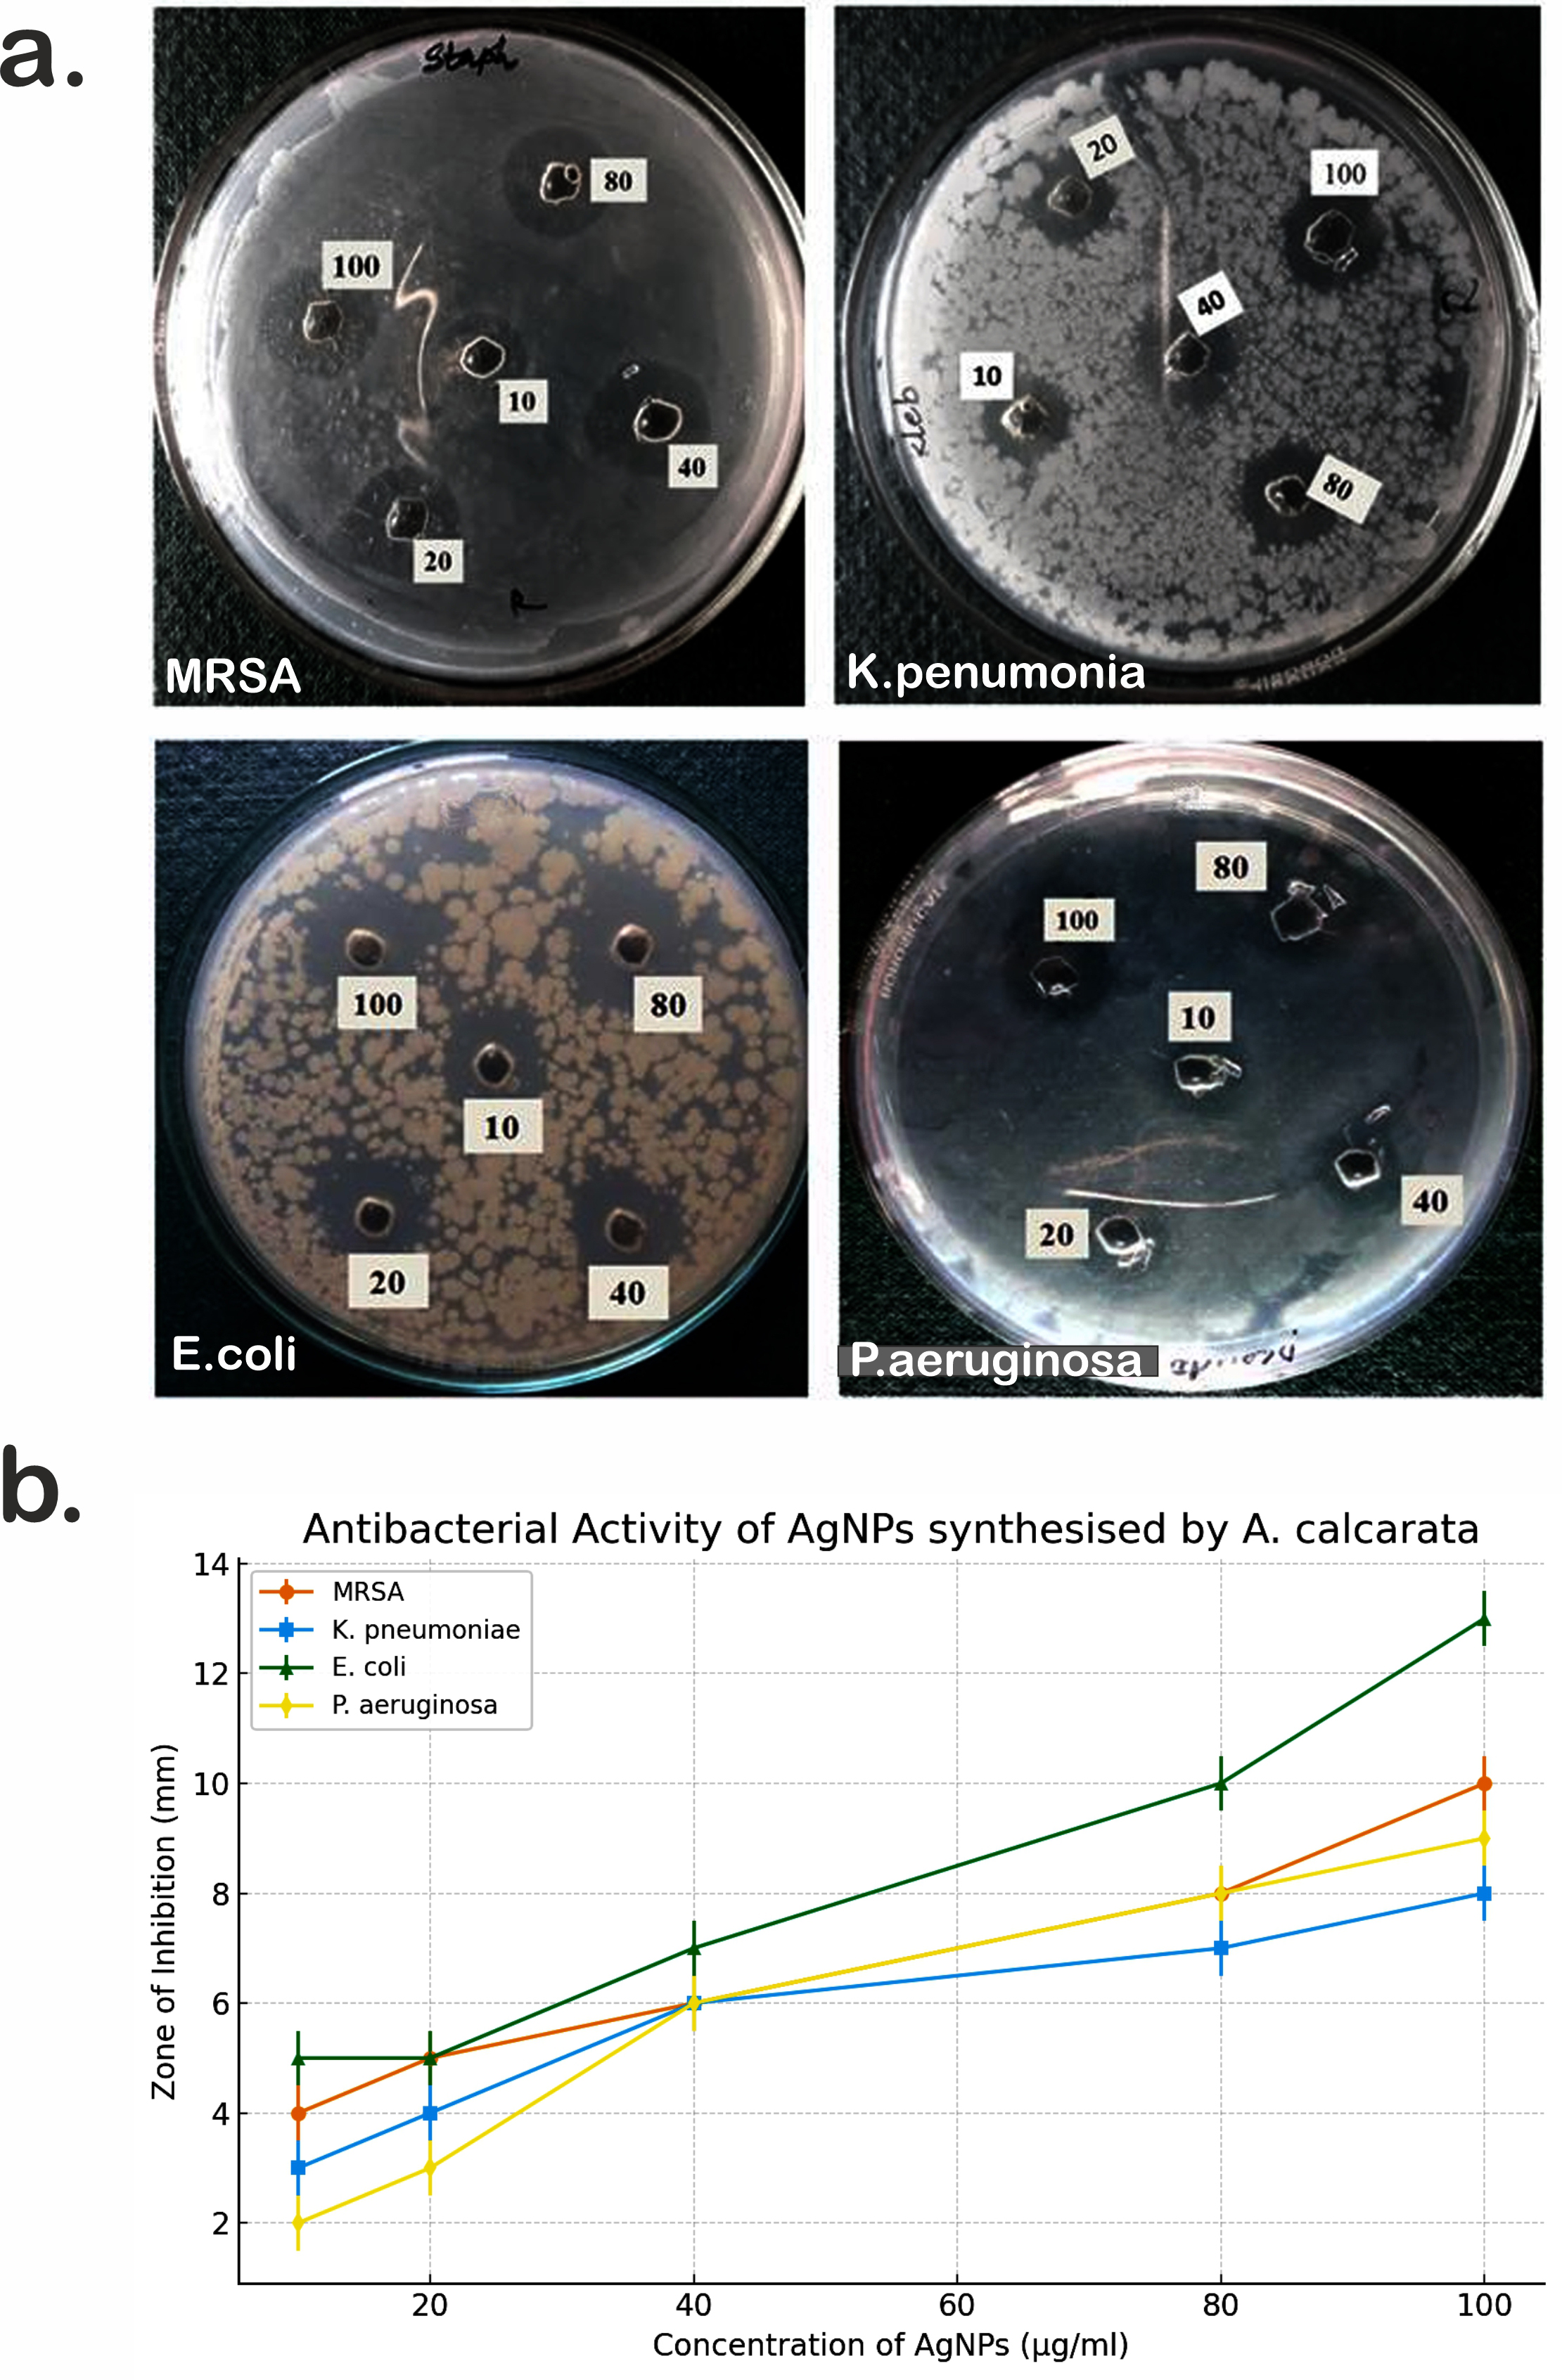


**Figure S2.**Preliminary antimicrobial activity assessment of biogenic silver nanoparticles synthesized using *Alpinia calcarata* leaf extract. (a) Representative agar-well diffusion images showing concentration-dependent zones of inhibition (ZOI) against methicillin-resistant *Staphylococcus aureus* (MRSA), *Klebsiella pneumoniae*, *Escherichia coli*, and *Pseudomonas aeruginosa* following 24 h incubation at 37 °C with *A. calcarata*-AgNPs at concentrations of 10–100 µg mL⁻¹. (b) Quantitative representation of the antibacterial activity, plotted as mean ZOI (mm) ± SD (n = 3 independent experiments) versus AgNP concentration (µg mL⁻¹). ZOI values include the well diameter (6 mm). The corresponding numerical data are provided in Table S5. The observed dose-dependent inhibition qualitatively corroborates the MIC/MBC findings presented in Table 5 of the main text.


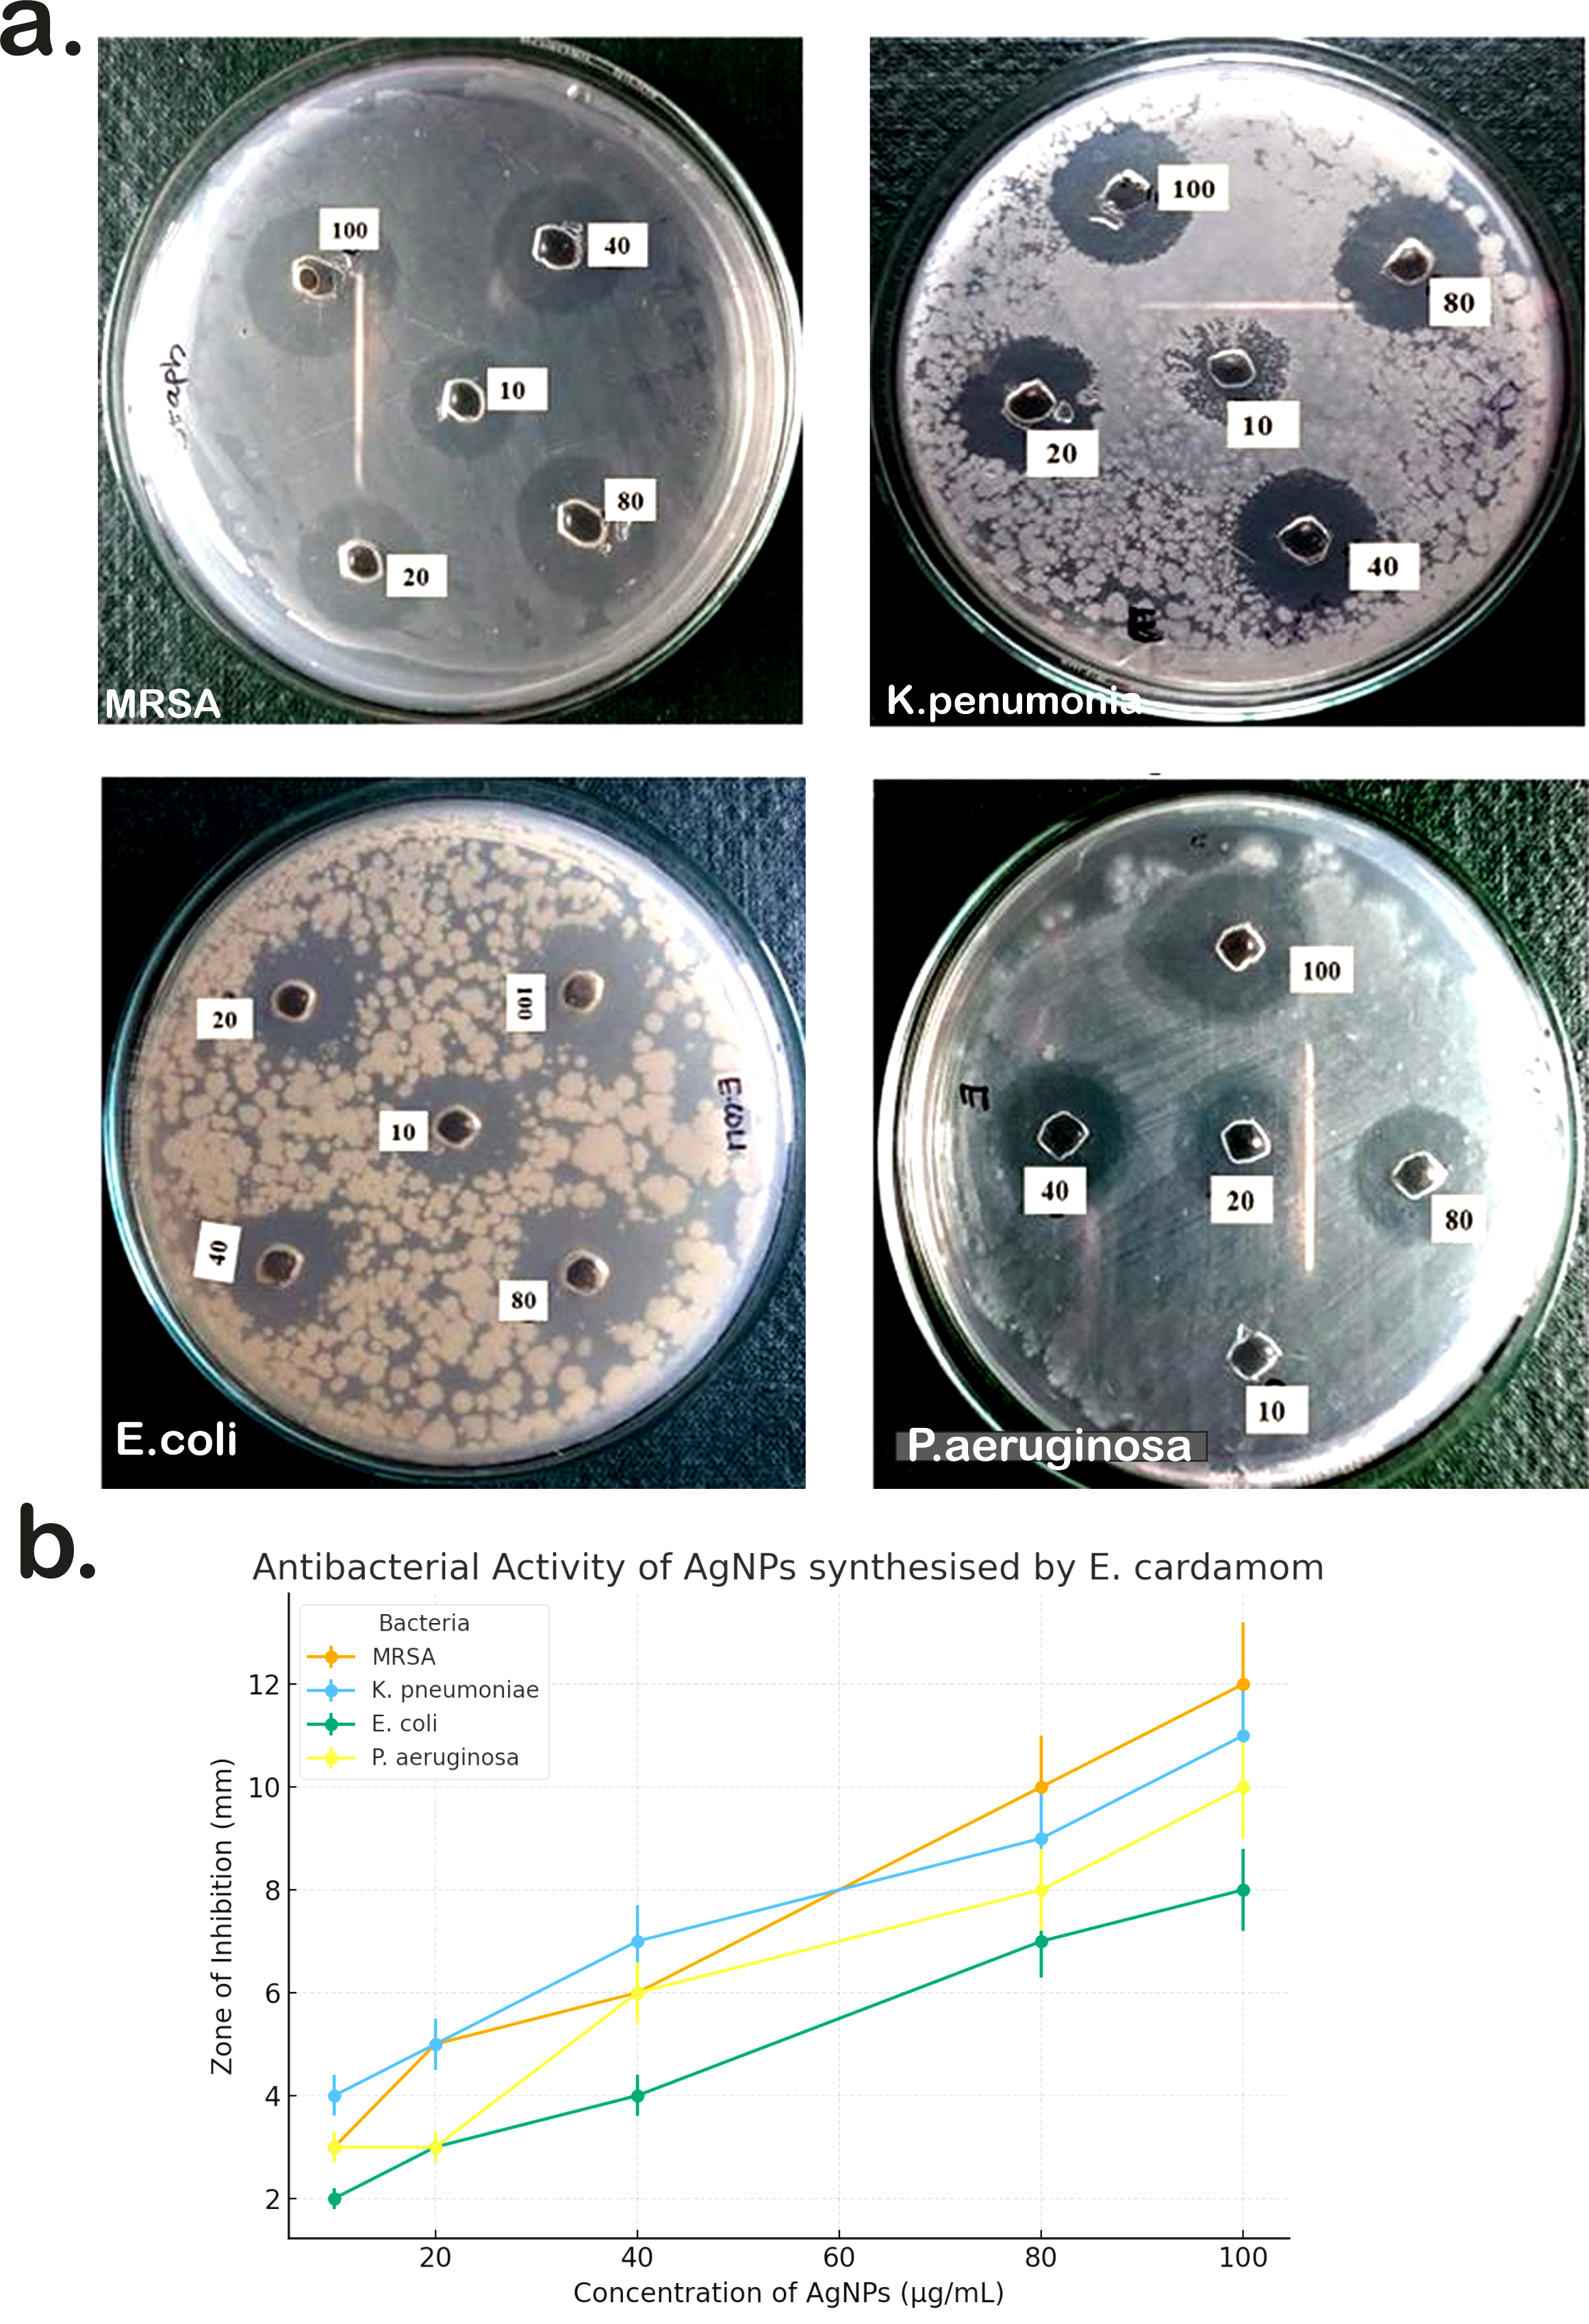


**Figure S3.** Preliminary antimicrobial activity assessment of biogenic silver nanoparticles synthesized using *Elettaria cardamomum* leaf extract. (a) Representative agar-well diffusion images showing concentration-dependent zones of inhibition (ZOI) against methicillin-resistant *Staphylococcus aureus* (MRSA), *Klebsiella pneumoniae*, *Escherichia coli*, and *Pseudomonas aeruginosa* following 24 h incubation at 37 °C with *E. cardamomum*-AgNPs at concentrations of 10–100 µg mL⁻¹. (b) Quantitative representation of the antibacterial activity, plotted as mean ZOI (mm) ± SD (n = 3 independent experiments) versus AgNP concentration (µg mL⁻¹). ZOI values include the well diameter (6 mm). The corresponding numerical data are provided in Table S5. The observed dose-dependent inhibition qualitatively corroborates the MIC/MBC findings presented in Table 5 of the main text.


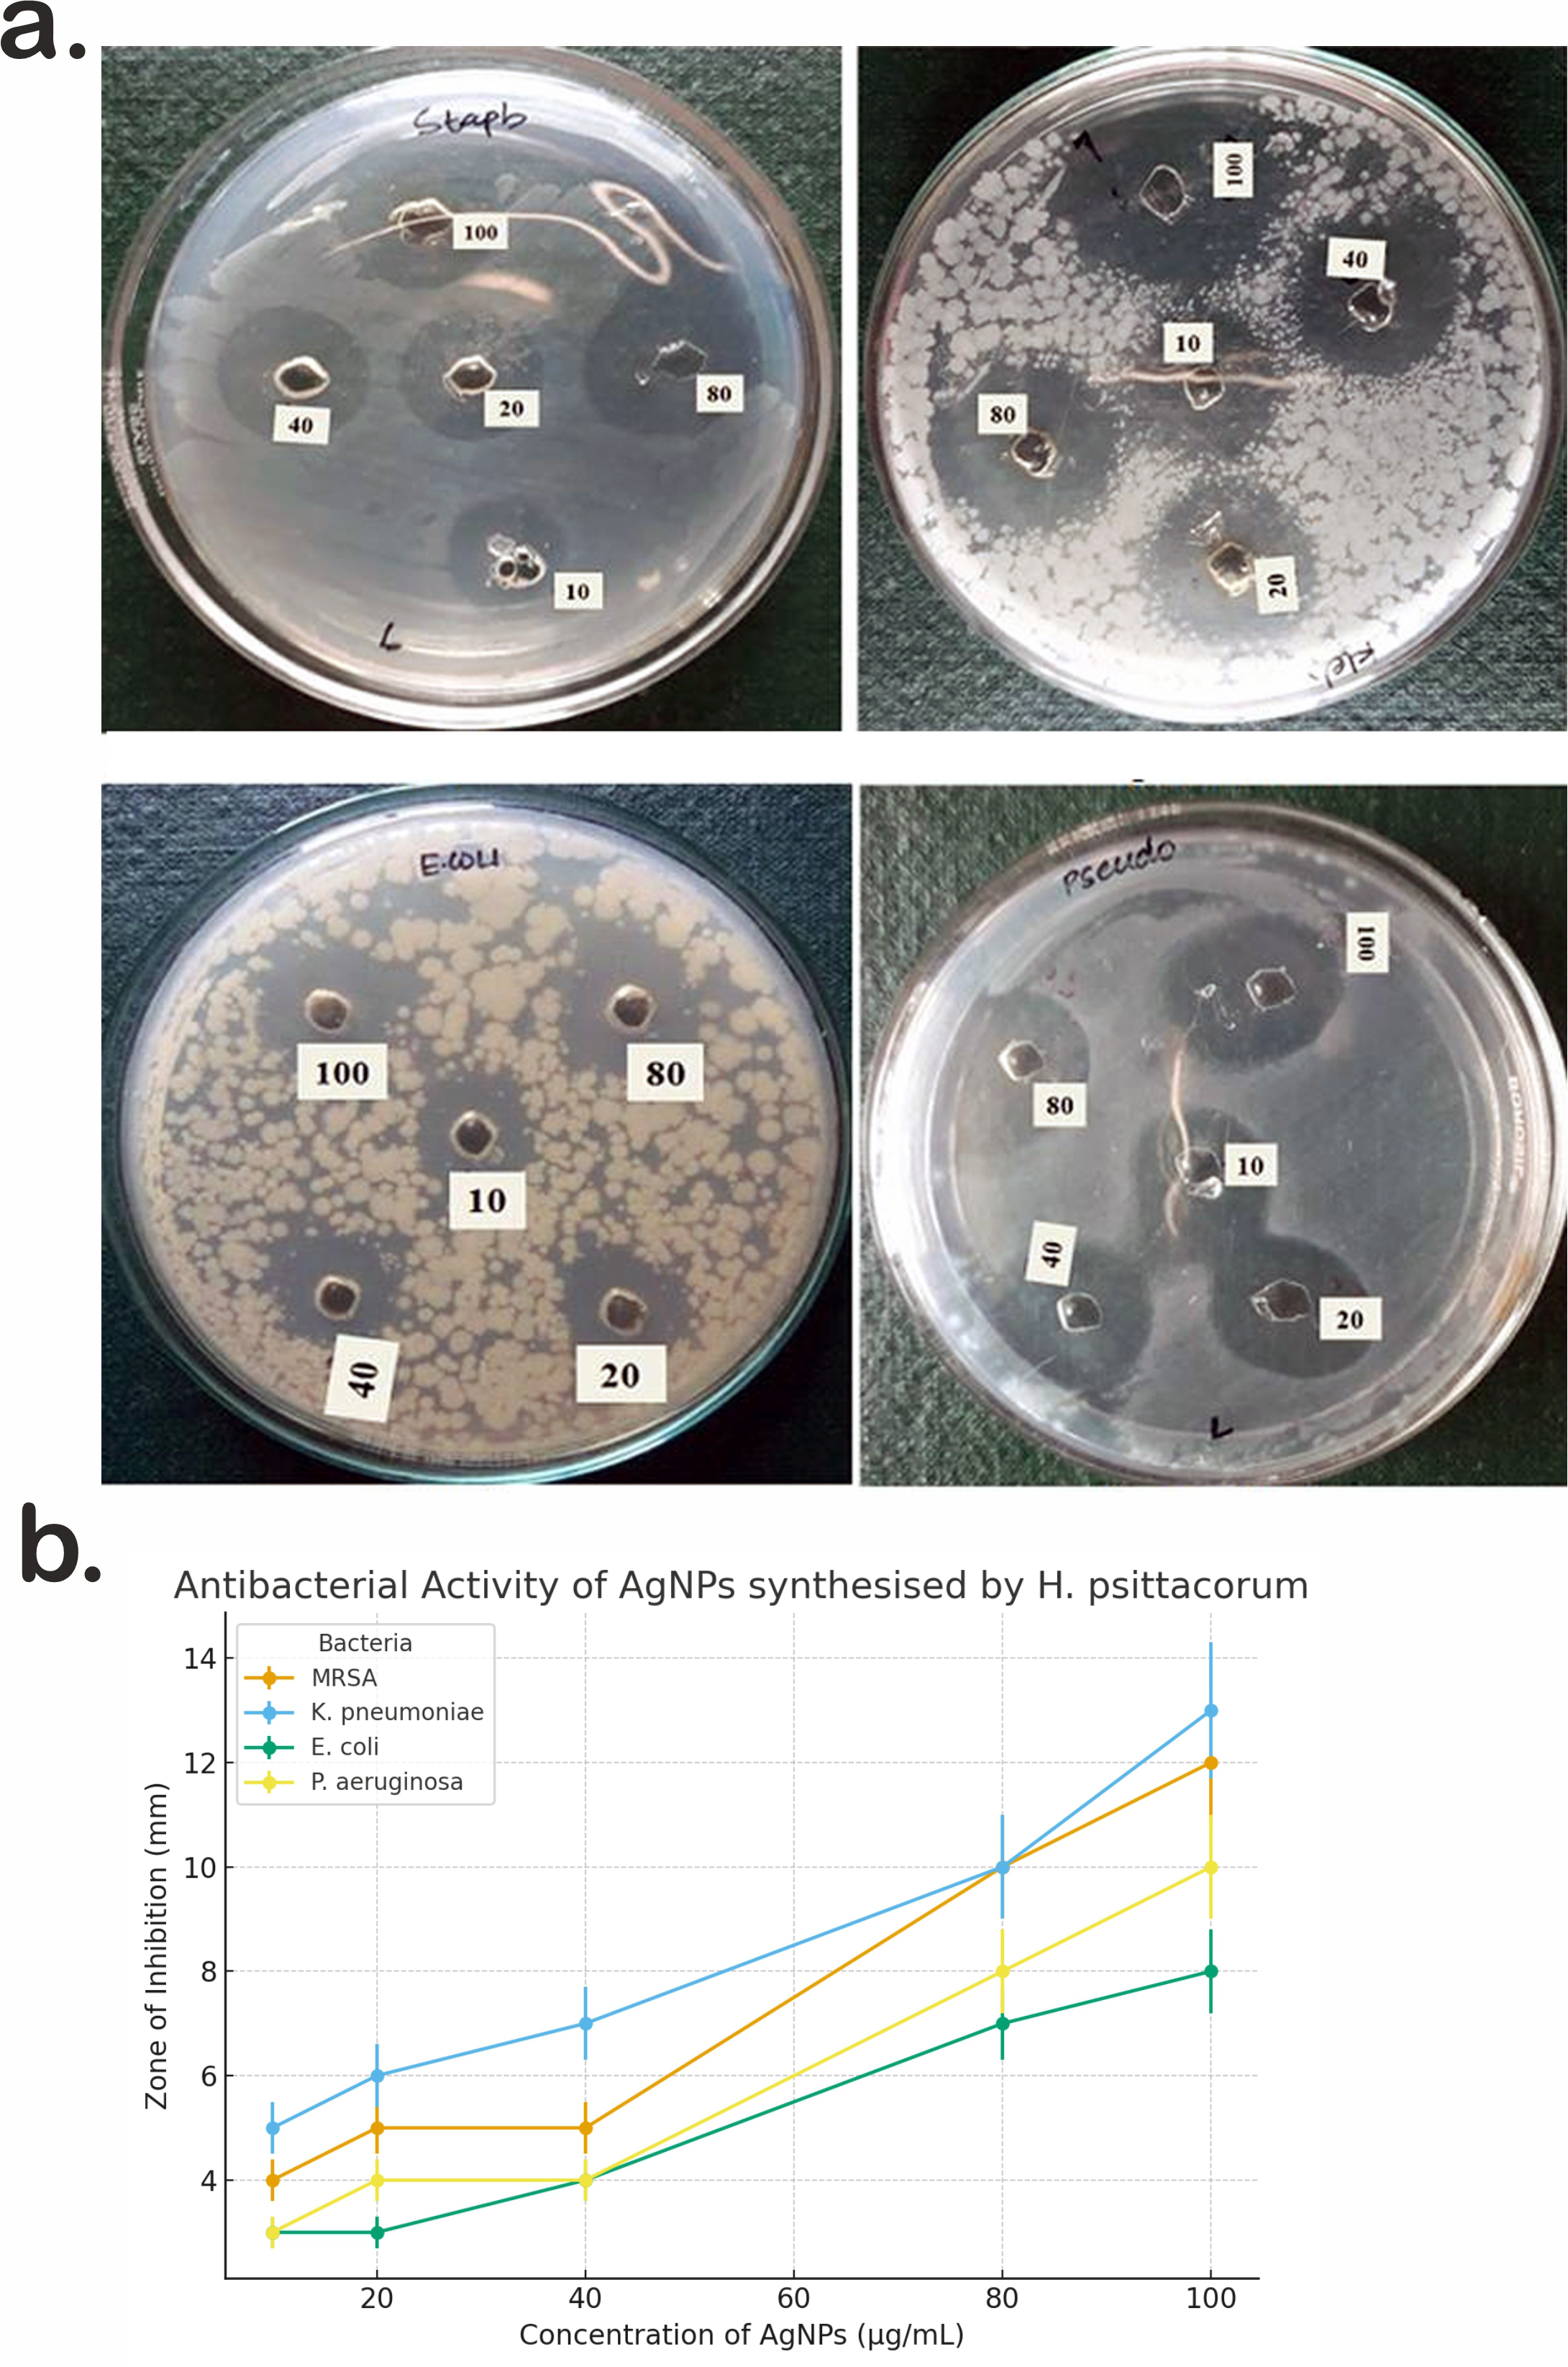


**Figure S4.** Preliminary antimicrobial activity assessment of biogenic silver nanoparticles synthesized using *Heliconia psittacorum* leaf extract. (a) Representative agar-well diffusion images showing concentration-dependent zones of inhibition (ZOI) against methicillin-resistant *Staphylococcus aureus* (MRSA), *Klebsiella pneumoniae*, *Escherichia coli*, and *Pseudomonas aeruginosa* following 24 h incubation at 37 °C with *H. psittacorum*-AgNPs at concentrations of 10–100 µg mL⁻¹. (b) Quantitative representation of the antibacterial activity, plotted as mean ZOI (mm) ± SD (n = 3 independent experiments) versus AgNP concentration (µg mL⁻¹). ZOI values include the well diameter (6 mm). The corresponding numerical data are provided in Table S5. Notably, *H. psittacorum*-AgNPs consistently exhibited the largest inhibition zones across all tested bacterial strains, reflecting their superior antibacterial potency and corroborating the lowest MIC values presented in Table 5 of the main text.

**
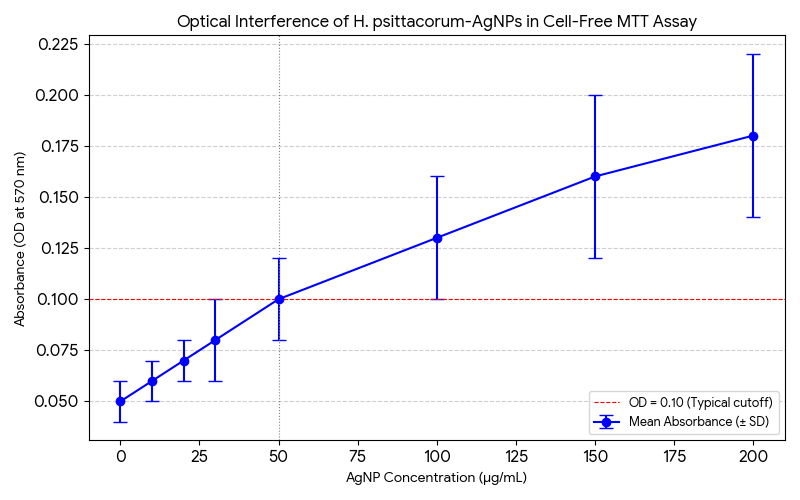
**

**Figure S5**. Evaluation of optical interference of H. psittacorum-derived AgNPs in the cell-free MTT assay. H. psittacorum-AgNPs (0–200 µg/mL) were incubated in complete culture medium for 48 h without cells, followed by MTT addition and formazan solubilization in DMSO. Absorbance was measured at 570 nm. Data are expressed as mean ± SD (n = 3). The red dashed line indicates the commonly accepted threshold for negligible interference (OD = 0.10). Absorbance remained below this threshold up to ~70 µg/mL, confirming minimal interference at concentrations relevant to the observed cytotoxic range (IC₅₀ ≈ 32.8 µg/mL). This low interference is attributed to the effective biogenic capping by alkaloid-rich phytochemicals from H. psittacorum extract.
